# Supplementary material for: Observational operator for fair model calibration with ground NO 2 measurements
Source: Copernicus journal article supplement (doi:10.5194/gmd-2023-216), 2024-02-09
Supplement: Supplementary file 1 [file gmd-2023-216-supplement.pdf]

## 1 OMI observations

The NO<sub>2</sub> column concentrations were sourced from NASA Goddard Space Flight Center, specifically from the Goddard Earth Sciences Data and Information Services Center (GES DISC), through the OMI/Aura Multi-wavelength Aerosol Optical Depth and Single Scattering Albedo L3 1-day Best Pixel in 0.25 degree x 0.25 degree V3 (OMAEROe) product (Stein-Zweers and Veeffkind, 2012). OMAEROe employs a multi-wavelength algorithm that utilizes up to 20 wavelength bands spanning from 331 nm to 500 nm to select the most accurate aerosol value from Level2G good quality data within each grid. The selection criteria are based on the shortest optical path length, which is determined by the secant of solar zenith angle and secant of viewing zenith angle. We initially processed the daily cloud-screened column amount of NO<sub>2</sub> into monthly OMI column NO<sub>2</sub> data, followed by regriding it to a resolution of 0.5 degrees latitude by 0.625 degrees longitude, equivalent to the GEOS-Chem horizontal resolution.

## 2 Model validation

We conducted model validation using daily model simulations and ground observations from 2015 to 2017. The R<sup>2</sup> values for NO<sub>2</sub> and PM<sub>2.5</sub> were found to be 0.73 and 0.79, respectively. These results indicate that the model is capable of capturing the time variation in these pollutants to some extent. The NMB values for NO<sub>2</sub> and PM<sub>2.5</sub> were 57.68% and 20.4%, respectively, indicating that GEOS-Chem underestimates these pollutants compared to observations. Notably, the underestimation of NO<sub>2</sub> is more severe, with its NMB being more than twice that of PM<sub>2.5</sub>.

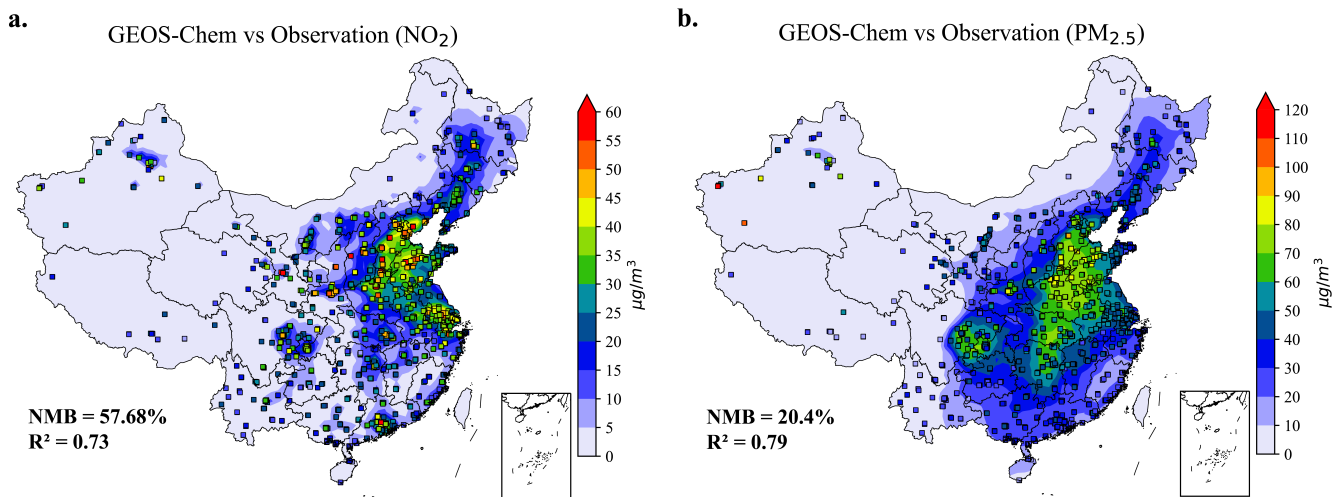

**Figure S1.** The model validation of GEOS-Chem for the simulation of ground NO<sub>2</sub> and PM<sub>2.5</sub>. Panels a and b denote the three-year averaged ground NO<sub>2</sub> and PM<sub>2.5</sub> concentrations from GEOS-Chem simulation and ground observations, respectively. The NMB and R<sup>2</sup> for the NO<sub>2</sub> validation is 57.68% and 0.73. The NMB and R<sup>2</sup> for the PM<sub>2.5</sub> validation is 20.4% and 0.79.

## 3 Formula of the statistic matrices

$$\text{RMSE} = \sqrt{\frac{1}{n} \sum_{i=1}^n (y_i - \hat{y}_i)^2} \quad (\text{S1})$$

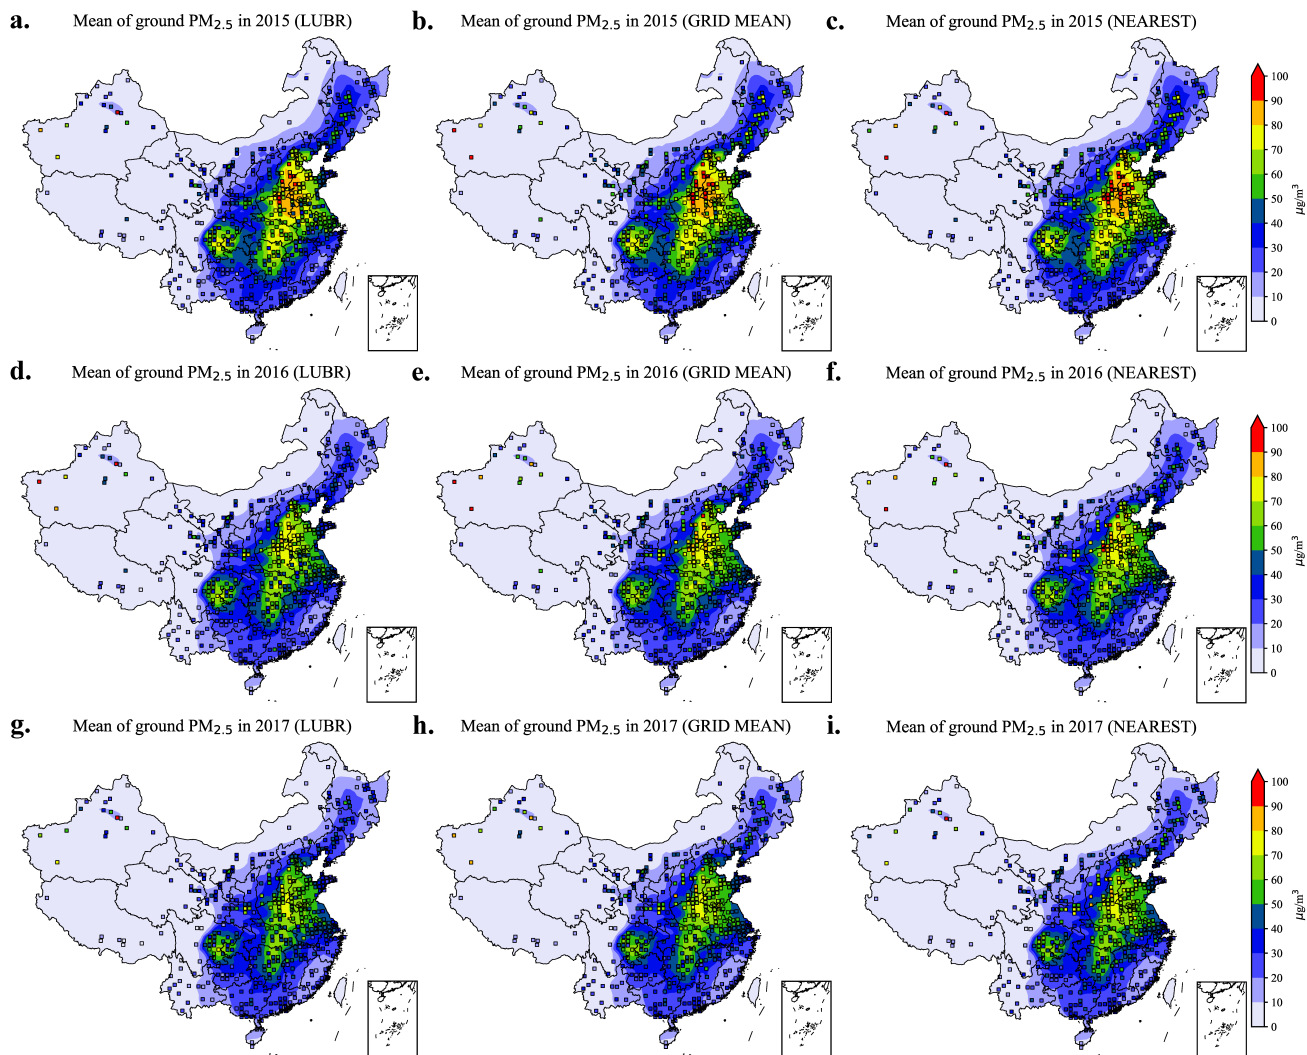

**Figure S2.** The annual averaged ground PM<sub>2.5</sub> from GEOS-Chem simulations (filled contours) and the represented observations of simulation grids (colored squares) from three methods. Panels a, d, and g present results using the LUBR method to represent grid PM<sub>2.5</sub> concentrations for 2015, 2016, and 2017, respectively. Panels b, e, and h present results using the grid mean method. Panels c, f, and i present results using the nearest search method.

$$\text{MAE} = \frac{1}{n} \sum_{i=1}^n |y_i - \hat{y}_i| \quad (\text{S2})$$

$$\text{NMB} = \frac{\sum_{i=1}^n (y_i - \hat{y}_i)}{\sum_{i=1}^n \hat{y}_i} \times 100\% \quad (\text{S3})$$

$$R^2 = 1 - \frac{\sum_{i=1}^n (y_i - \hat{y}_i)^2}{\sum_{i=1}^n (y_i - \bar{y})^2} \quad (\text{S4})$$

where  $n$  represents the size of the dataset,  $\hat{y}_i$  and  $y_i$  denote the predicted values of GEOS-Chem and true observations, respectively, and  $\bar{y}$  represents the mean of the observed values.

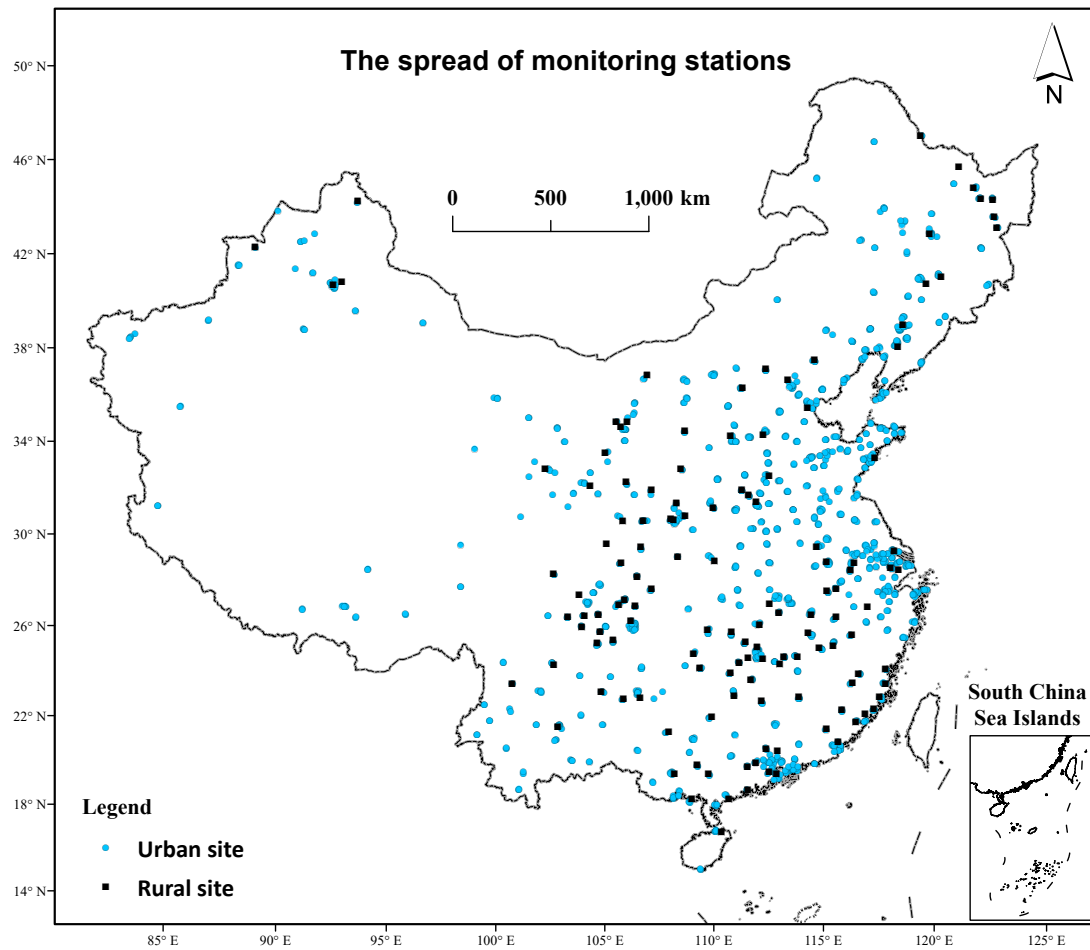

**Figure S3.** The spread of air quality monitoring stations in China. The turquoise dots and black squares represent urban sites and rural sites, respectively.

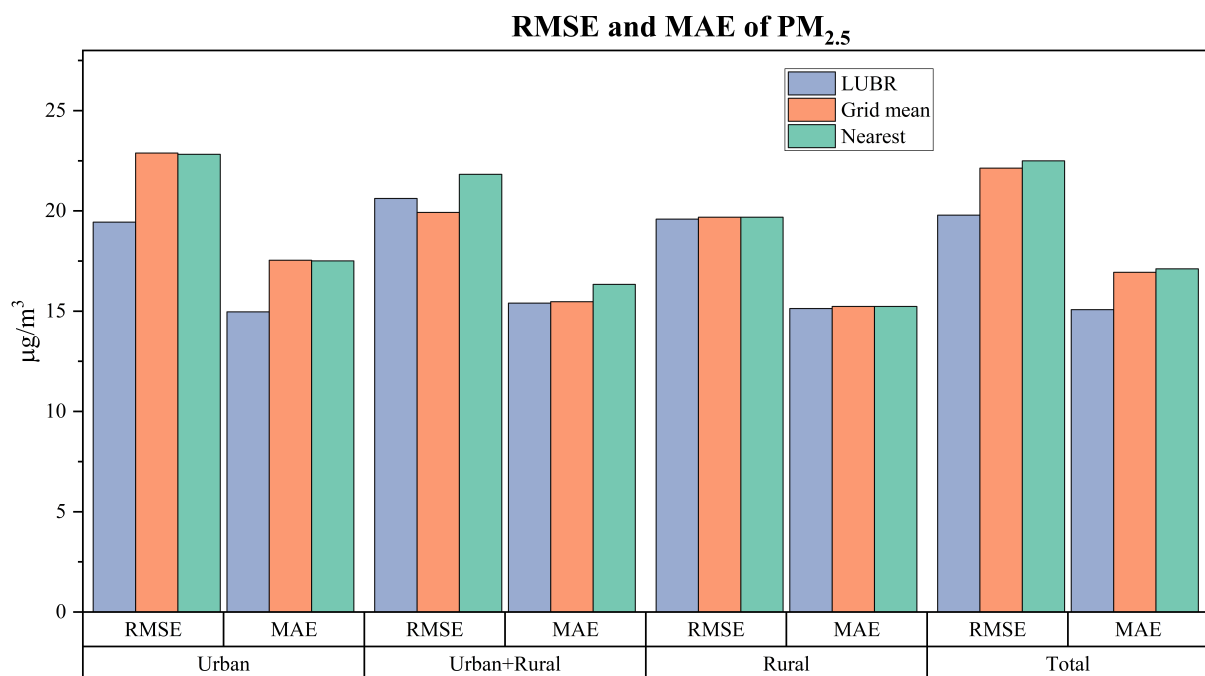

**Figure S4.** The comprehensive statistical results, encompassing RMSE and MAE, demonstrate the performance of the gridded PM<sub>2.5</sub> observations compared to the GEOS-Chem simulations. The colors ice blue, rosy red, and cyan represent the LUBR, nearest search, and grid mean methods, respectively. 'Urban,' 'Urban+Rural,' and 'Rural' categorize grids based on the presence of urban and rural sites. 'Urban' includes grids with exclusively urban sites, 'Urban+Rural' includes both urban and rural sites, and 'Rural' comprises grids with only rural sites. 'Total' aggregates results by calculating the average across all three categories.

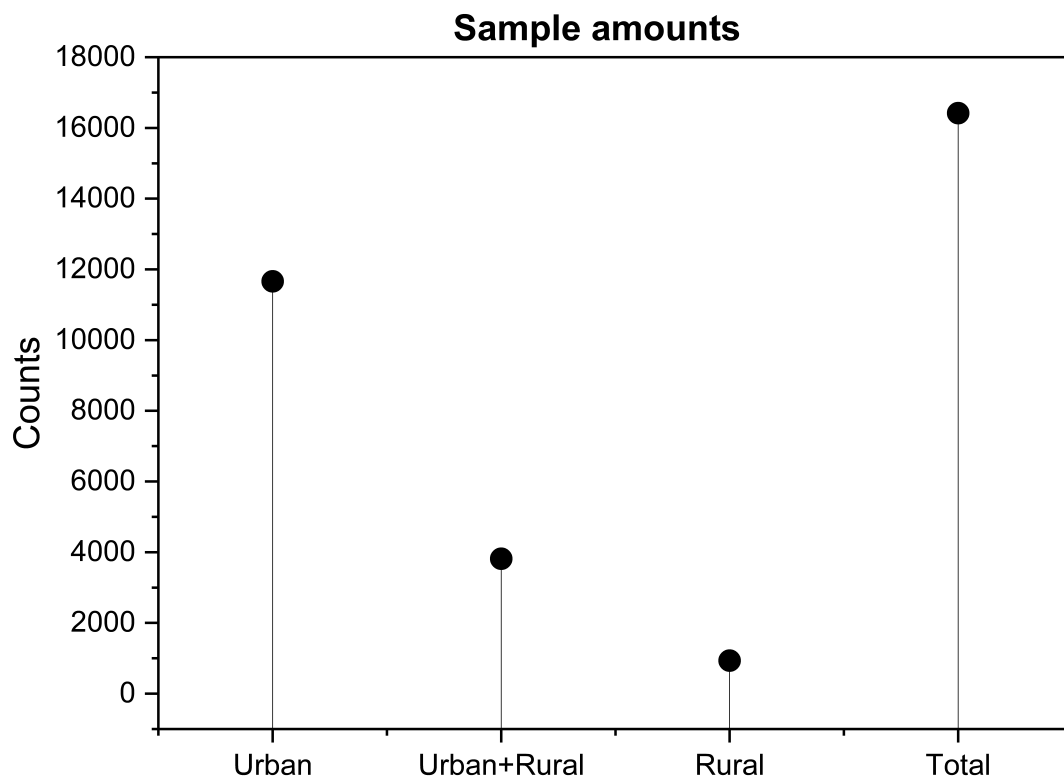

**Figure S5.** The sample amounts of the categorized grids of 'Urban,' 'Urban+Rural,' 'Rural,' and 'Total'.

## References

Stein-Zweers, D. and Veefkind, P.: OMI/Aura Multi-wavelength Aerosol Optical Depth and Single Scattering Albedo L3 1 day Best Pixel in 0.25 degree x 0.25 degree V3, NASA Goddard Space Flight Center, Goddard Earth Sciences Data and Information Services Center (GES DISC), <https://doi.org/10.5067/Aura/OMI/DATA3004>, last Accessed: 20 Oct 2022, 2012.
